# Supplementary material for: Promising application of monoclonal antibody against chikungunya virus E1-antigen across genotypes in immunochromatographic rapid diagnostic tests
Source: Springer Nature journal article supplement (doi:10.1186/s12985-020-01364-4), 2020-07-02
Supplement: MOESM1 [file 18142560]

A

|       | Ave   | Membrane |          |          |          |          |          |          |
|-------|-------|----------|----------|----------|----------|----------|----------|----------|
|       |       | 3D11     | 9E3      | 11F11    | 13H11    | 19B8     | RC-5     | 15B2     |
| AuNps | 3D11  |          | 1.1 ±0.1 | 1.0 ±0.3 | 0.7 ±0.4 | 0.6 ±0.5 | 0.8 ±0.5 | 1.0 ±0.3 |
|       | 9E3   | 1.5 ±0.3 |          | 1.3 ±0.2 | 1.0 ±0.5 | 0.6 ±0.6 | 0.8 ±0.3 | 1.4 ±0.3 |
|       | 11F11 | 1.1 ±0.4 | 1.1 ±0.4 |          | 1.4 ±0.3 | 0.7 ±0.5 | 1.1 ±0.0 | 1.9 ±0.6 |
|       | 13H11 | 2.1 ±0.5 | 1.2 ±0.1 | 0.9 ±0.2 |          | 0.6 ±0.3 | 0.8 ±0.4 | 2.1 ±0.9 |
|       | 19B8  | 1.3 ±0.4 | 0.7 ±0.5 | 0.8 ±0.5 | 0.5 ±0.4 |          | 0.5 ±0.3 | 1.0 ±0.2 |
|       | RC-5  | 1.1 ±0.7 | 1.0 ±0.4 | 1.2 ±0.2 | 1.0 ±0.4 | 0.9 ±0.5 |          | 3.6 ±3.8 |

Mean ±SD

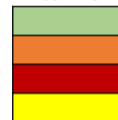

Strong non specific reaction or No signal

&lt; 1.0

Faint

1.0 - 2.0

Strong positive

&gt;2.0

Strong positive but high standard deviation

B

|       |      | Membrane |      |      |      |      |
|-------|------|----------|------|------|------|------|
|       |      | 24B3     | 26A2 | 32A3 | 37C7 | 41G5 |
| AuNps | 24B3 |          | 5.4  | 2.4  | 1.8  | 12.3 |
|       | 26A2 | 12.0     |      | 15.5 | 11.9 | 9.2  |
|       | 32A3 | 1.0      | 8.4  |      | 1.5  | 10.2 |
|       | 37C7 | 1.2      | 4.3  | 2.4  |      | 6.2  |
|       | 41G5 | 46.8     | 4.2  | 28.5 | 5.9  |      |

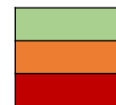

Strong non specific reaction

&lt; 1.0

Faint

1.0 - 2.0

Strong positive

&gt;2.0
