# Supplementary material for: Promising application of monoclonal antibody against chikungunya virus E1-antigen across genotypes in immunochromatographic rapid diagnostic tests
Source: Springer Nature journal article supplement (doi:10.1186/s12985-020-01364-4), 2020-07-02

Version-E RDT

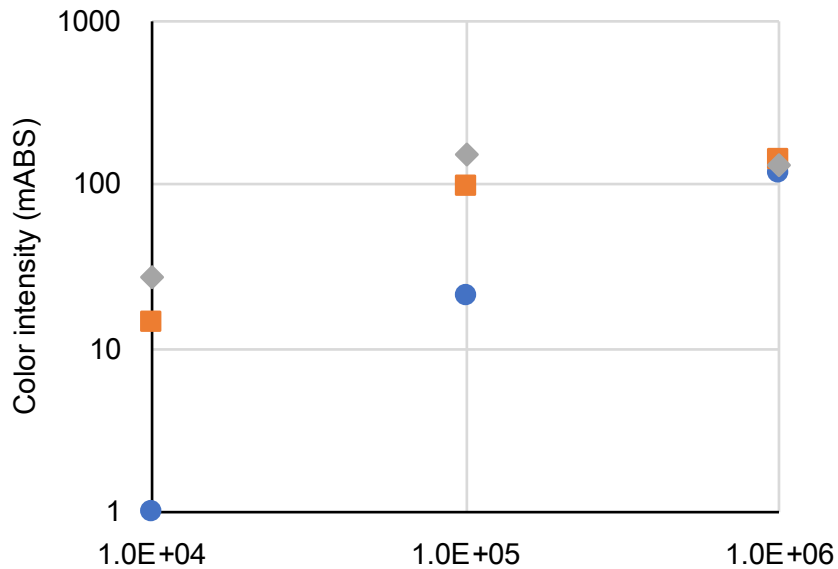

Version-F RDT

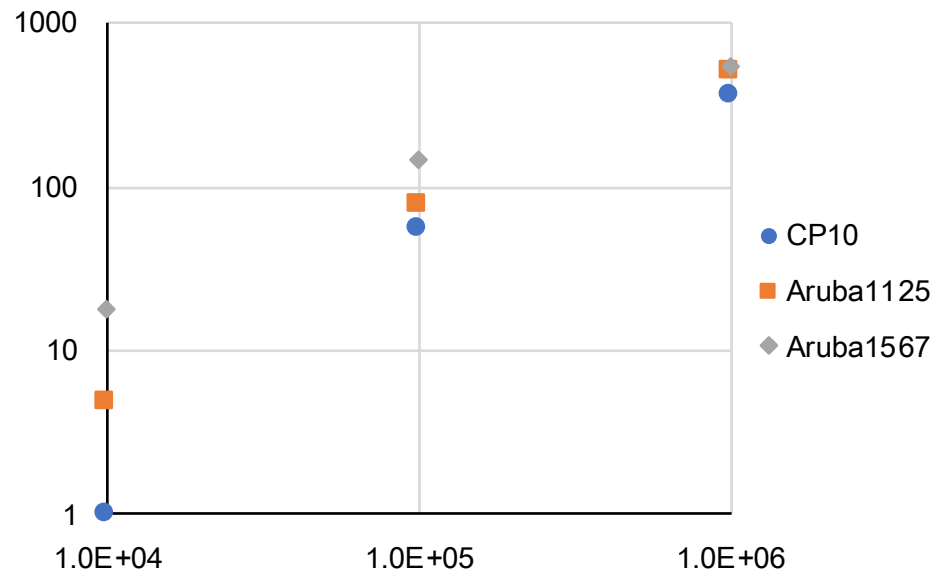

Version-M RDT

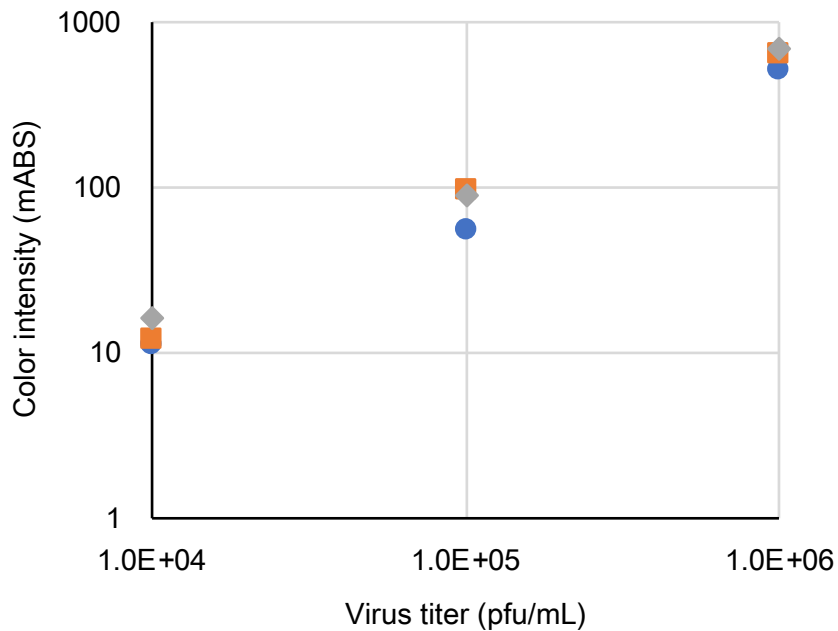

Version-N RDT

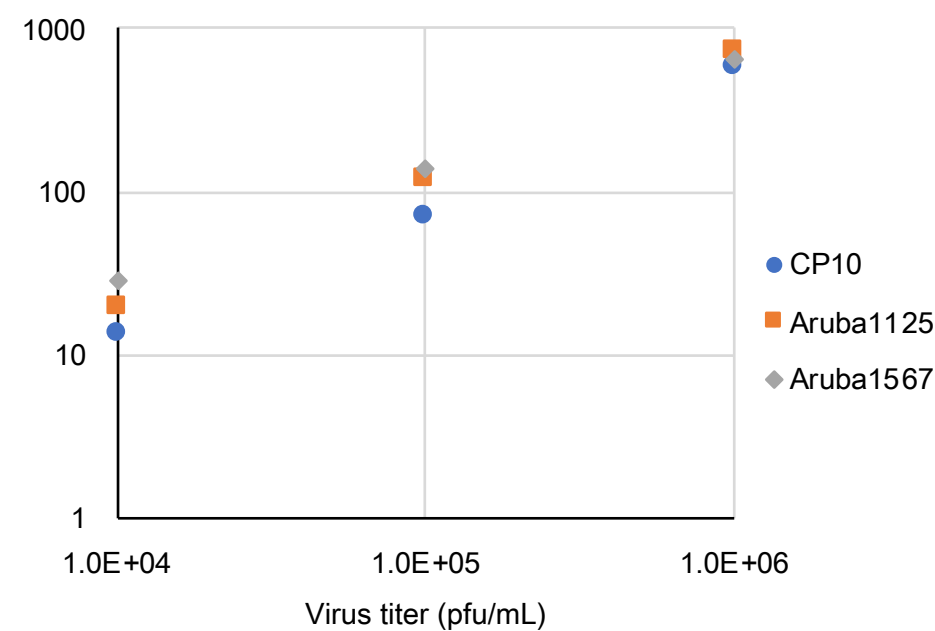

Supplement: MOESM2 [file 18142560]
