# Supplementary material for: Promising application of monoclonal antibody against chikungunya virus E1-antigen across genotypes in immunochromatographic rapid diagnostic tests
Source: Virol J. 2020 Jul 2;17:90. doi: 10.1186/s12985-020-01364-4 (PMC7330967; doi:10.1186/s12985-020-01364-4)
Supplement: Supplementary file 7 — Additional file 7. Data of Dhaka patients. ND: not determined. E1(mAbs): mili absorbance units of CHIKV E1 antigen immunochromatogaraphic rapid diagnostic test (version O). Positive results in CHIKV E1 detection, anti-CHIKV IgM, dengue virus NS1, anti-dengue virus IgM and IgG are highlighted with red. [file 12985_2020_1364_MOESM7_ESM.xlsx]

## Sheet: Additional file 6
Additional file 7. Data of Dhaka patients.
		Ct value			CHIKV			Dengue Duo (SD-Bioline)
No.	Serum ID	DV	CHIKV		E1 (mAbs)	IgM ELISA		NS1 (mAbs)	IgM(mAbs)	IgG(mAbs)
1	S-1629	negative	11.17		573.1	negative		ND	ND	ND
2	S-1624	negative	29.47		0	negative		ND	ND	ND
3	S-1620	negative	30.03		0	negative		ND	ND	ND
4	S-1616	negative	30.5		2.9	negative		ND	ND	ND
5	S-1583	negative	31.91		25.8	positive		ND	ND	ND
6	S-1562	negative	22.58		37.1	negative		ND	ND	ND
7	S-1558	negative	16.03		77	negative		ND	ND	ND
8	S-1553	negative	14.69		110.6	negative		ND	ND	ND
9	S-1542	negative	11.99		337.3	negative		ND	ND	ND
10	S-1538	negative	14.97		269.1	negative		ND	ND	ND
11	S-1528	negative	22.73		36.4	negative		ND	ND	ND
12	S-1523	negative	19.69		73.7	negative		ND	ND	ND
13	S-1521	negative	11.92		488.7	negative		ND	ND	ND
14	S-1502	negative	21.81		59.9	negative		ND	ND	ND
15	S-1499	negative	17.25		32.4	negative		ND	ND	ND
16	S-1493	negative	16.93		48.4	negative		ND	ND	ND
17	S-1474	negative	18.47		53.1	negative		ND	ND	ND
18	S-1457	negative	21.83		187	negative		ND	ND	ND
19	S-1448	negative	16.65		33.5	negative		ND	ND	ND
20	S-1435	negative	23.21		32.6	negative		ND	ND	ND
21	S-1425	negative	15.02		96.1	negative		ND	ND	ND
22	S-1423	negative	19.85		58	negative		ND	ND	ND
23	S-1413	negative	13.7		190.6	negative		ND	ND	ND
24	S-1404	negative	14.9		216.1	negative		ND	ND	ND
25	S-1403	negative	17.18		77	negative		ND	ND	ND
26	S-1394	negative	11.25		398.8	negative		ND	ND	ND
27	S-1390	negative	17.07		143.2	negative		ND	ND	ND
28	S-1370	negative	14.04		237.5	negative		ND	ND	ND
29	S-1368	negative	18.59		94.4	negative		ND	ND	ND
30	S-1346	negative	11.77		394	negative		ND	ND	ND
31	S-1332	negative	19.09		11.8	negative		ND	ND	ND
32	S-1324	negative	24.53		63.8	negative		ND	ND	ND
33	S-1323	negative	18.4		29.4	negative		0	4.8	25
34	S-1322	negative	17.78		30.7	negative		0	3.3	19.3
35	S-1319	negative	16.96		30.1	negative		0	0	0
36	S-1316	negative	15.43		83.6	negative		0	5.3	15.5
37	S-1306	negative	14.1		293.4	negative		0	27.3	28.5
38	S-1304	negative	17.77		48.6	negative		0	0	0
39	S-1300	negative	15.46		167.3	negative		1	228.9	188.7
40	S-1299	negative	23.33		87.2	negative		0	0	0
41	S-1281	negative	17.43		43.9	negative		0	0	0
42	S-1279	negative	20.29		29.1	negative		0	0	0
43	S-1277	negative	14.49		92.7	negative		0	0	9
44	S-1275	negative	24.1		76.7	negative		0	0	0
45	S-1270	negative	16.69		152.7	negative		0	0	0
46	S-1269	negative	19.08		20.5	negative		0	0	0
47	S-1232	negative	21.91		12.6	negative		ND	ND	ND
48	S-1210	negative	19.97		19	negative		0	0	0
49	S-1209	negative	24.07		36.8	negative		0	4.8	0
50	S-1206	negative	16.72		50.3	negative		0	0	15.7
51	S-1204	negative	21.05		16.8	negative		ND	ND	ND
52	S-1199	negative	17.86		334.6	negative		ND	ND	ND
53	S-1191	negative	14.49		89.2	negative		ND	ND	ND
54	S-1187	negative	19.94		162.8	negative		ND	ND	ND
55	S-1173	negative	15.82		105.6	negative		ND	ND	ND
56	S-1170	negative	17.17		51.8	negative		ND	ND	ND
57	S-1157	negative	14.85		113.6	negative		ND	ND	ND
58	S-1151	negative	21.62		7.3	negative		ND	ND	ND
59	S-1150	negative	15.19		101.5	negative		ND	ND	ND
60	S-1149	negative	14.78		92.7	negative		ND	ND	ND
61	S-1148	negative	17.6		33.3	negative		ND	ND	ND
62	S-1147	negative	18.89		15	negative		ND	ND	ND
63	S-1145	negative	12.78		343.1	negative		ND	ND	ND
64	S-1134	negative	16.82		41.8	negative		ND	ND	ND
65	S-1121	negative	17.65		157.4	negative		ND	ND	ND
66	S-1096	negative	25.09		35	negative		ND	ND	ND
67	S-1084	negative	12.05		378.5	negative		ND	ND	ND
68	S-1082	negative	15.29		34.9	negative		ND	ND	ND
69	S-1072	negative	16.56		23.1	negative		ND	ND	ND
70	S-1064	negative	16.49		36.1	negative		ND	ND	ND
71	S-1054	negative	22.92		32.3	negative		ND	ND	ND
72	S-1053	negative	14.26		398	negative		ND	ND	ND
73	S-1052	negative	23.01		95.9	negative		ND	ND	ND
74	S-1050	negative	13.85		130.9	negative		ND	ND	ND
75	S-1049	negative	16.07		79	negative		ND	ND	ND
76	S-1041	negative	13.56		211.9	negative		ND	ND	ND
77	S-1034	negative	13.9		97.9	negative		ND	ND	ND
78	S-1028	negative	15.1		94.5	negative		ND	ND	ND
79	S-1027	negative	15.04		37.6	negative		ND	ND	ND
80	S-1024	negative	23.22		7.8	negative		ND	ND	ND
81	S-1019	negative	14.89		68.9	negative		ND	ND	ND
82	S-1016	negative	15.11		72.4	negative		ND	ND	ND
83	S-1014	negative	17.27		38.8	negative		ND	ND	ND
84	S-1013	negative	12.05		235.1	negative		ND	ND	ND
85	S-1012	negative	14.29		139.9	negative		ND	ND	ND
86	S-998	negative	15.18		39.2	negative		ND	ND	ND
87	S-997	negative	16.59		19.8	negative		ND	ND	ND
88	S-994	negative	21.48		166.8	negative		ND	ND	ND
89	S-993	negative	15.46		47.5	negative		ND	ND	ND
90	S-982	negative	18.61		27.5	negative		ND	ND	ND
91	S-980	negative	22.25		82	negative		ND	ND	ND
92	S-967	negative	17.12		19.1	negative		ND	ND	ND
93	S-966	negative	18.28		15.7	negative		ND	ND	ND
94	S-957	negative	18.43		89.8	negative		ND	ND	ND
95	S-944	negative	15.29		86.9	negative		ND	ND	ND
96	S-938	negative	14.23		168.3	negative		ND	ND	ND
97	S-934	negative	13.28		207.5	negative		ND	ND	ND
98	S-932	negative	18.61		3.1	negative		ND	ND	ND
99	S-926	negative	17.97		21.5	negative		ND	ND	ND
100	S-921	negative	11.98		332.6	negative		ND	ND	ND
101	S-1673	32.68	negative		0	ND		0	0	0
102	S-1661	32.82	negative		0	ND		ND	ND	ND
103	S-1651	20.78	negative		0	ND		82.7	0	0
104	S-1639	22.07	negative		4.6	ND		231.2	0	0
105	S-1635	19.96	negative		2.9	ND		68.8	0	0
106	S-1634	17.36	negative		0	ND		162.8	0	0
107	S-1622	18.35	negative		0	ND		27	0	0
108	S-1621	31.58	negative		2.9	ND		23.8	408.6	0
109	S-1596	29.5	negative		0	ND		38.2	61	29.7
110	S-1591	25.25	negative		0	ND		266.2	41	0
111	S-1585	32.76	negative		0	ND		0	12.2	107.7
112	S-1581	33.42	negative		2.1	ND		0	0	61.6
113	S-1571	20.26	negative		0	ND		116.3	0	0
114	S-1570	20.54	negative		4.6	ND		204.6	0	0
115	S-1566	24.58	negative		0	ND		44.6	0	0
116	S-1565	25.38	negative		0	ND		15	0	0
117	S-1563	24.32	negative		0	ND		50.6	3.9	0
118	S-1561	31.8	negative		0	ND		0	98.2	168.7
119	S-1560	20.27	negative		0	ND		ND	ND	ND
120	S-1556	19.23	negative		0	ND		171	0	10
121	S-1554	22.49	negative		3.1	ND		84	0	0
122	S-1549	24.42	negative		4.6	ND		8.5	0	0
123	S-1547	22.21	negative		0	ND		434.8	0	0
124	S-1545	23.88	negative		0	ND		283.7	10.1	0
125	S-1541	18.83	negative		0	ND		211.8	0	0
126	S-1540	21.41	negative		0	ND		254.8	0	0
127	S-1535	24.71	negative		6.3	ND		143.2	7.4	0
128	S-1527	33.75	negative		0	ND		ND	ND	ND
129	S-1526	29.26	negative		0	ND		0	15.4	56.5
130	S-1524	30.54	negative		4.2	ND		267	109	0
131	S-1517	23.94	negative		0	ND		155.8	0	37.9
132	S-1515	28.15	negative		0	ND		0	19.7	56.4
133	S-1514	22.38	negative		2.3	ND		110	9.4	0
134	S-1513	27.24	negative		4.3	ND		80.9	0	39.1
135	S-1505	31.57	negative		0	ND		ND	ND	ND
136	S-1504	30.02	negative		0	ND		0	0	0
137	S-1500	33.67	negative		2.9	ND		0	5.5	10.4
138	S-1496	19.79	negative		2.8	ND		ND	ND	ND
139	S-1495	20.57	negative		2.9	ND		189.8	0	0
140	S-1489	17.09	negative		0	ND		361.4	0	0
141	S-1486	28.79	negative		0	ND		0	4.5	0
142	S-1482	18.63	negative		0	ND		ND	ND	ND
143	S-1479	18.35	negative		0	ND		186.4	0	0
144	S-1477	21.62	negative		0	ND		72.4	0	0
145	S-1476	26.84	negative		3.2	ND		ND	ND	ND
146	S-1473	20.99	negative		0	ND		126.3	0	0
147	S-1471	19.53	negative		1.1	ND		ND	ND	ND
148	S-1466	22.65	negative		1.4	ND		54.6	0	0
149	S-1455	25.42	negative		3.4	ND		15.8	0	0
150	S-1454	22.88	negative		0	ND		20.4	0	0
151	S-1451	23.08	negative		0	ND		218.3	0	0
152	S-1450	19.68	negative		3.9	ND		60.4	0	0
153	S-1449	20.3	negative		0	ND		234.2	0	0
154	S-1443	31.84	negative		5.5	ND		257.7	8.2	109.9
155	S-1441	27.21	negative		0	ND		152	2.9	0
156	S-1431	16.29	negative		5.3	ND		ND	ND	ND
157	S-1429	26.92	negative		3.4	ND		75.1	34.1	58.2
158	S-1428	25.22	negative		3.9	ND		97.8	3.8	0
159	S-1422	26.72	negative		3.2	ND		150.2	15.6	38.4
160	S-1415	23.32	negative		3.5	ND		20.6	0	0
161	S-1409	23.9	negative		2	ND		ND	ND	ND
162	S-1402	18.69	negative		0	ND		ND	ND	ND
163	S-1397	24.21	negative		0	ND		336.2	0	0
164	S-1387	24.28	negative		0	ND		ND	ND	ND
165	S-1383	22.03	negative		0	ND		233.6	0	0
166	S-1382	19.26	negative		6.8	ND		ND	ND	ND
167	S-1365	20.06	negative		3.7	ND		107.3	0	0
168	S-1364	24.03	negative		4.8	ND		208	12.2	17
169	S-1360	22.94	negative		3.3	ND		13.1	4.9	6.8
170	S-1357	17.13	negative		3.2	ND		285.8	0	0
171	S-1353	19.17	negative		0	ND		18.2	0	0
172	S-1345	22.55	negative		3.4	ND		ND	ND	ND
173	S-1327	21.47	negative		3.2	ND		153.9	1.6	0
174	S-1318	16.08	negative		4	ND		108.9	0	0
175	S-1310	22.96	negative		0	ND		44.3	0	0
176	S-1309	23.04	negative		3.5	ND		94.7	0	0
177	S-1237	24.98	negative		0	ND		252.9	33.5	0
178	S-1296	20.28	negative		0	ND		129.8	0	0
179	S-1285	17.02	negative		0	ND		233.6	4.6	0
180	S-1278	18.5	negative		3	ND		ND	ND	ND
181	S-1265	21.99	negative		3.2	ND		ND	ND	ND
182	S-1264	22.3	negative		0	ND		ND	ND	ND
183	S-1257	18.45	negative		0	ND		315.8	0	0
184	S-1244	21.75	negative		0	ND		47.8	6.3	39.2
185	S-1303	19.08	negative		0	ND		232.4	0	0
186	S-1230	22.26	negative		0	ND		193	12.1	0
187	S-1224	20.04	negative		0	ND		121.6	0	0
188	S-1221	24.59	negative		0	ND		ND	ND	ND
189	S-1218	16.51	negative		0	ND		168.5	2.5	0
190	S-1214	20.71	negative		0	ND		122.2	0	0
191	S-1203	19.05	negative		0	ND		ND	ND	ND
192	S-1190	23.39	negative		3.1	ND		190	0	0
193	S-1186	15.83	negative		0	ND		114.8	0	0
194	S-1184	22.37	negative		0	ND		19.3	0	0
195	S-1177	19.5	negative		0	ND		376.2	0	0
196	S-1171	23.74	negative		0	ND		416.9	6.6	10.9
197	S-1165	25.04	negative		0	ND		205.8	129	15
198	S-1155	17.26	negative		0	ND		ND	ND	ND
199	S-1152	23.42	negative		0	ND		84.7	0	0
200	S-1135	25.69	negative		3.1	ND		ND	ND	ND
201	S-319	negative	negative		4.2	positive		ND	ND	ND
202	S-341	negative	negative		2.2	positive		ND	ND	ND
203	S-345	negative	negative		0	positive		ND	ND	ND
204	S-351	negative	negative		0	positive		ND	ND	ND
205	S-355	negative	negative		0	positive		ND	ND	ND
206	S-360	negative	negative		1.7	positive		ND	ND	ND
207	S-373	negative	negative		16.2	positive		ND	ND	ND
208	S-378	negative	negative		5.5	positive		ND	ND	ND
209	S-383	negative	negative		2.1	positive		ND	ND	ND
210	S-384	negative	negative		3	positive		ND	ND	ND
211	S-436	negative	negative		4.6	positive		ND	ND	ND
212	S-450	negative	negative		4.9	positive		ND	ND	ND
213	S-474	negative	negative		3	positive		ND	ND	ND
214	S-481	negative	negative		18.7	positive		ND	ND	ND
215	S-485	negative	negative		9.3	positive		ND	ND	ND
216	S-516	negative	negative		0	positive		ND	ND	ND
217	S-517	negative	negative		0	positive		ND	ND	ND
218	S-519	negative	negative		0	positive		ND	ND	ND
219	S-534	negative	negative		2.9	positive		ND	ND	ND
220	S-547	negative	negative		0	positive		ND	ND	ND
221	S-548	negative	negative		0	positive		ND	ND	ND
222	S-588	negative	negative		2.2	positive		ND	ND	ND
223	S-589	negative	negative		109.6	positive		ND	ND	ND
224	S-590	negative	negative		1.8	positive		ND	ND	ND
225	S-594	negative	negative		3.8	positive		ND	ND	ND
226	S-596	negative	negative		0	positive		ND	ND	ND
227	S-599	negative	negative		3.9	positive		ND	ND	ND
228	S-601	negative	negative		0	positive		ND	ND	ND
229	S-606	negative	negative		1.4	positive		ND	ND	ND
230	S-631	negative	negative		0	positive		ND	ND	ND
231	S-634	negative	negative		0	positive		ND	ND	ND
232	S-637	negative	negative		0	positive		ND	ND	ND
233	S-638	negative	negative		0	positive		ND	ND	ND
234	S-639	negative	negative		0	positive		ND	ND	ND
235	S-640	negative	negative		1.4	positive		ND	ND	ND
236	S-648	negative	negative		1.4	positive		ND	ND	ND
237	S-679	negative	negative		3.9	positive		ND	ND	ND
238	S-689	negative	negative		1.4	positive		ND	ND	ND
239	S-697	negative	negative		0	positive		ND	ND	ND
240	S-700	negative	negative		0	positive		ND	ND	ND
241	S-748	negative	negative		2.1	positive		ND	ND	ND
242	S-758	negative	negative		12.8	positive		ND	ND	ND
243	S-801	negative	negative		1.8	positive		ND	ND	ND
244	S-817	negative	negative		1.9	positive		ND	ND	ND
245	S-819	negative	negative		2.5	positive		ND	ND	ND
246	S-823	negative	negative		1.9	positive		ND	ND	ND
247	S-830	negative	negative		1.6	positive		ND	ND	ND
248	S-844	negative	negative		3.4	positive		ND	ND	ND
249	S-868	negative	negative		0	positive		ND	ND	ND
250	S-881	negative	negative		2.2	positive		ND	ND	ND
251	S-889	negative	negative		0	positive		ND	ND	ND
252	S-898	negative	negative		0	positive		ND	ND	ND
253	S-903	negative	negative		0	positive		ND	ND	ND
254	S-920	negative	negative		2	positive		ND	ND	ND
255	S-930	negative	negative		3.7	positive		ND	ND	ND
256	S-956	negative	negative		0	positive		ND	ND	ND
257	S-960	negative	negative		6.3	positive		ND	ND	ND
258	S-962	negative	negative		0	positive		ND	ND	ND
259	S-972	negative	negative		2.3	positive		ND	ND	ND
260	S-991	negative	negative		3	positive		ND	ND	ND
261	S-1005	negative	negative		0	positive		ND	ND	ND
262	S-1020	negative	negative		5.6	positive		ND	ND	ND
263	S-1044	negative	negative		1.4	positive		3	4	11
264	S-1047	negative	negative		8.4	positive		4.9	0	28
265	S-1055	negative	negative		1.4	positive		3.9	0	0
266	S-1062	negative	negative		2.2	positive		0	8.3	20.4
267	S-1063	negative	negative		0	positive		0	0	57.5
268	S-1099	negative	negative		0	positive		3.9	0	15.7
269	S-1101	negative	negative		4	positive		3.2	0	0
270	S-1159	negative	negative		1.5	positive		0	0	0
271	S-1161	negative	negative		2.8	positive		0	0	0
272	S-1169	negative	negative		0	positive		4.2	3.5	21.3
273	S-1231	negative	negative		0	positive		2.1	2.8	5.1
274	S-1234	negative	negative		1.5	positive		3.3	0	17.2
275	S-1235	negative	negative		1.8	positive		1.8	4.7	17.1
276	S-1236	negative	negative		3	positive		0	0	13.3
277	S-1239	negative	negative		0	positive		0	0	0
278	S-1262	negative	negative		4.5	positive		0	31	21.8
279	S-1276	negative	negative		0	positive		0	0	0
280	S-1335	negative	negative		0	positive		2.7	15.3	0
281	S-1355	negative	negative		0	positive		1.3	0	0
282	S-1359	negative	negative		0	positive		0	0	0
283	S-1363	negative	negative		1.9	positive		0	0	0
284	S-1367	negative	negative		2.4	positive		0	0	0
285	S-1376	negative	negative		2.6	positive		0	0	0
286	S-1392	negative	negative		5	positive		4.1	64.5	36.8
287	S-1437	negative	negative		1.6	positive		2	0	0
288	S-1475	negative	negative		4.3	positive		0	0	0
289	S-1520	negative	negative		2.1	positive		0	0	9.6
290	S-1575	negative	negative		2	positive		0	6.2	0
291	S-1606	negative	negative		0	positive		3.1	8.5	12.1
292	S-1608	negative	negative		0	positive		0	0	13.5
293	S-1613	negative	negative		0	positive		0	0	0
294	S-290	negative	negative		ND	positive		ND	ND	ND
295	S-308	negative	negative		ND	positive		ND	ND	ND
296	S-527	negative	negative		ND	positive		ND	ND	ND
297	S-572	negative	negative		ND	positive		ND	ND	ND
298	S-582	negative	negative		ND	positive		ND	ND	ND
299	S-715	negative	negative		ND	positive		ND	ND	ND
300	S-975	negative	negative		ND	positive		ND	ND	ND
301	S-992	negative	negative		ND	positive		ND	ND	ND
302	S-1069	negative	negative		ND	positive		5.7	0	0
303	S-1081	negative	negative		ND	positive		ND	ND	ND
304	S-1519	negative	negative		ND	positive		0	0	0
305	S-1636	negative	negative		ND	negative		5.6	38.9	10.3
306	S-1623	negative	negative		ND	negative		0	0	22.5
307	S-1614	negative	negative		ND	negative		2.4	0	13.5
308	S-1611	negative	negative		ND	negative		0	2.5	0
309	S-1607	negative	negative		ND	negative		0	1.3	3.5
310	S-1594	negative	negative		ND	negative		0	4	11.2
311	S-1564	negative	negative		ND	negative		0	0	0
312	S-1551	negative	negative		ND	negative		0	0	0
313	S-1534	negative	negative		ND	negative		0	34.3	15.2
314	S-1530	negative	negative		ND	negative		0	2.8	0
315	S-1525	negative	negative		ND	negative		0	1.2	8.2
316	S-1506	negative	negative		ND	negative		28.3	58	0
317	S-1494	negative	negative		ND	negative		1.5	0	19.1
318	S-1488	negative	negative		ND	negative		0	0	32.9
319	S-1472	negative	negative		ND	negative		0	0	17.1
320	S-1461	negative	negative		ND	negative		4.6	0	15.3
321	S-1442	negative	negative		ND	negative		0	0	0
322	S-1434	negative	negative		ND	negative		0	73.5	27.1
323	S-1432	negative	negative		ND	negative		0	9.7	10.8
324	S-1412	negative	negative		ND	negative		0	0	0
325	S-1410	negative	negative		ND	negative		2	1.5	9.7
326	S-1384	negative	negative		ND	negative		1.4	5.8	19.1
327	S-1374	negative	negative		ND	negative		3.6	0	0
328	S-1371	negative	negative		ND	negative		0	0	11.1
329	S-1366	negative	negative		ND	negative		4.4	0	0
330	S-1352	negative	negative		ND	negative		0	0	0
331	S-1340	negative	negative		ND	negative		0	0	0
332	S-1334	negative	negative		ND	negative		1.5	0	0
333	S-1298	negative	negative		ND	negative		0	0	0
334	S-1293	negative	negative		ND	negative		5.5	170.4	26.6
335	S-1271	negative	negative		ND	negative		0	0	0
336	S-1261	negative	negative		ND	negative		0	0	0
337	S-1253	negative	negative		ND	negative		2.7	0	0
338	S-1247	negative	negative		ND	negative		1.1	0	0
339	S-1211	negative	negative		ND	negative		4.6	0	0
340	S-1197	negative	negative		ND	negative		3.3	1.6	62
341	S-1189	negative	negative		ND	negative		7.4	0	15.2
342	S-1185	negative	negative		ND	negative		6	0	26.5
343	S-1183	negative	negative		ND	negative		3.5	0	26
344	S-1180	negative	negative		ND	negative		3	0	9.6
345	S-1158	negative	negative		ND	negative		7.3	4.4	31.6
346	S-1138	negative	negative		ND	negative		3.4	0	0
347	S-1126	negative	negative		ND	negative		0	2.4	4.5
348	S-1117	negative	negative		ND	negative		0	0	0
349	S-1091	negative	negative		ND	negative		0	0	7.8
350	S-1086	negative	negative		ND	negative		3	0	0
351	S-1085	negative	negative		ND	negative		4.3	0	0
352	S-1083	negative	negative		ND	negative		0	8.1	10.7
353	S-1046	negative	negative		ND	negative		4.3	0	0
354	S-1038	negative	negative		ND	negative		5.8	0	0
355	S-250	negative	negative		ND	negative		ND	ND	ND
356	S-264	negative	negative		ND	negative		ND	ND	ND
357	S-266	negative	negative		ND	negative		ND	ND	ND
358	S-272	negative	negative		ND	negative		ND	ND	ND
359	S-278	negative	negative		ND	negative		ND	ND	ND
360	S-279	negative	negative		ND	negative		ND	ND	ND
361	S-294	negative	negative		ND	negative		ND	ND	ND
362	S-299	negative	negative		ND	negative		ND	ND	ND
363	S-303	negative	22.81		ND	negative		ND	ND	ND
364	S-306	negative	19.59		ND	negative		ND	ND	ND
365	S-309	negative	negative		ND	negative		ND	ND	ND
366	S-318	negative	negative		ND	negative		ND	ND	ND
367	S-322	negative	negative		ND	negative		ND	ND	ND
368	S-327	negative	negative		ND	negative		ND	ND	ND
369	S-336	negative	negative		ND	negative		ND	ND	ND
370	S-339	negative	negative		ND	negative		ND	ND	ND
371	S-340	negative	negative		ND	negative		ND	ND	ND
372	S-344	negative	negative		ND	negative		ND	ND	ND
373	S-352	negative	20.52		ND	negative		ND	ND	ND
374	S-357	negative	20.77		ND	negative		ND	ND	ND
375	S-359	negative	21.45		ND	negative		ND	ND	ND
376	S-361	negative	21.11		ND	negative		ND	ND	ND
377	S-362	negative	19.97		ND	negative		ND	ND	ND
378	S-365	negative	21.47		ND	negative		ND	ND	ND
379	S-367	negative	21.67		ND	negative		ND	ND	ND
380	S-369	negative	negative		ND	negative		ND	ND	ND
381	S-370	negative	negative		ND	negative		ND	ND	ND
382	S-372	negative	20.96		ND	negative		ND	ND	ND
383	S-380	negative	negative		ND	negative		ND	ND	ND
384	S-387	negative	negative		ND	negative		ND	ND	ND
385	S-388	negative	negative		ND	negative		ND	ND	ND
386	S-403	negative	negative		ND	negative		ND	ND	ND
387	S-404	negative	negative		ND	negative		ND	ND	ND
388	S-412	negative	negative		ND	negative		ND	ND	ND
389	S-425	negative	negative		ND	negative		ND	ND	ND
390	S-433	negative	negative		ND	negative		ND	ND	ND
391	S-459	negative	negative		ND	negative		ND	ND	ND
392	S-466	negative	negative		ND	negative		ND	ND	ND
393	S-472	negative	negative		ND	negative		ND	ND	ND
394	S-499	negative	negative		ND	negative		ND	ND	ND
395	S-524	negative	negative		ND	negative		ND	ND	ND
396	S-530	negative	negative		ND	negative		ND	ND	ND
397	S-563	negative	negative		ND	negative		ND	ND	ND
398	S-564	negative	negative		ND	negative		ND	ND	ND
399	S-569	negative	negative		ND	negative		ND	ND	ND
400	S-579	negative	negative		ND	negative		ND	ND	ND
401	S-597	negative	negative		ND	negative		ND	ND	ND
402	S-600	negative	negative		ND	negative		ND	ND	ND
403	S-622	negative	negative		ND	negative		ND	ND	ND
404	S-624	negative	negative		ND	negative		ND	ND	ND
405	S-627	negative	negative		ND	negative		ND	ND	ND
406	S-656	negative	negative		ND	negative		ND	ND	ND
407	S-709	negative	negative		ND	negative		ND	ND	ND
408	S-745	negative	negative		ND	negative		ND	ND	ND
409	S-747	negative	negative		ND	negative		ND	ND	ND
410	S-787	negative	negative		ND	negative		ND	ND	ND
411	S-805	negative	negative		ND	negative		ND	ND	ND
412	S-814	negative	negative		ND	negative		ND	ND	ND
413	S-815	negative	negative		ND	negative		ND	ND	ND
414	S-859	negative	negative		ND	negative		ND	ND	ND
415	S-1000	negative	negative		ND	negative		ND	ND	ND
ND: not determiend
E1(mAbs): mili absorbance units of CHIKV E1 antigen immunochromatogaraphic rapid diagnostic test (version O)
Positive results in CHIKV E1 detection, anti-CHIKV IgM, dengue virus NS1, anti-dengue virus IgM and IgG are highlighted with red.
